# Supplementary material
Source: ML conference proceedings conference paper supplement (https://openreview.net/forum?id=zbHpRwzrq5)
Supplement: supplementary_material [file Readme.pdf › Appendix/Comparison with SOTA methods/Readme.pdf]

This file contains videos, each comprising three motion sequences generated by MoMask, BAMM, and MATE, respectively. The corresponding textual description is provided in the filename of each video. The generated motions are analyzed as follows.

|                                                                                                                                                              |                                                                                                      |
|--------------------------------------------------------------------------------------------------------------------------------------------------------------|------------------------------------------------------------------------------------------------------|
| 1. A person <b>tiptoes backward</b> .                                                                                                                        |                                                                                                      |
| MoMask                                                                                                                                                       | The person slightly tiptoes but does not move backward.                                              |
| BAMM                                                                                                                                                         | The person neither tiptoes nor moves backward.                                                       |
| MATE                                                                                                                                                         | Correct                                                                                              |
| 2. A person <b>walks forward, increases his pace</b> , and then leaps in the air.                                                                            |                                                                                                      |
| MoMask                                                                                                                                                       | The person neither obviously increases pace nor leaps, but instead walks upstairs.                   |
| BAMM                                                                                                                                                         | The person leaps and runs without starting with walking or increasing the pace.                      |
| MATE                                                                                                                                                         | Correct.                                                                                             |
| 3. A person <b>walks forward a few steps, turns around mid-step</b> , places their hands on the ground and begins to crawl forward on their hands and knees. |                                                                                                      |
| MoMask                                                                                                                                                       | The person neither walks forward nor turns around mid-step.                                          |
| BAMM                                                                                                                                                         | The person neither walks forward nor turns around mid-step.                                          |
| MATE                                                                                                                                                         | Correct.                                                                                             |
| 4. He steps forward and picks something from a shelf, then turns, walks back, <b>turns around, and returns it</b> .                                          |                                                                                                      |
| MoMask                                                                                                                                                       | The person returns something before turning around, and does not return it to its original location. |
| BAMM                                                                                                                                                         | The person returns something before turning around, and does not return it to its original location. |
| MATE                                                                                                                                                         | Correct.                                                                                             |
| 5. A person walks <b>quickly</b> in a <b>counterclockwise</b> circle.                                                                                        |                                                                                                      |
| MoMask                                                                                                                                                       | The person does not walk noticeably quickly.                                                         |
| BAMM                                                                                                                                                         | The person walks in a clockwise circle, and not at a noticeably fast pace.                           |
| MATE                                                                                                                                                         | Correct. The person walks obviously faster than in the other two motions.                            |
