# Supplementary material
Source: ML conference proceedings conference paper supplement (https://openreview.net/forum?id=zbHpRwzrq5)
Supplement: supplementary_material [file Readme.pdf › Appendix/Generalization to unseen words/Readme.pdf]

This file contains examples with textual descriptions that include unseen words. Each description is displayed in the corresponding video filename. The analysis is provided below, and unseen words are highlighted in red.

|                                                                        |                                                                                                                                                                                           |
|------------------------------------------------------------------------|-------------------------------------------------------------------------------------------------------------------------------------------------------------------------------------------|
| 1. A person is playing <b>tug-of-war</b> .                             |                                                                                                                                                                                           |
| MoMask                                                                 | The person bends over with some hand gestures, but the motion does not resemble tug-of-war.                                                                                               |
| BAMM                                                                   | The person is sliding around and clearly not engaging in a tug-of-war motion.                                                                                                             |
| MATE                                                                   | The person bends over and appears to pull something with their hands, which is the closest to a tug-of-war motion among the three.                                                        |
| 2. A person is pulling a rope backward, as if in a <b>tug-of-war</b> . |                                                                                                                                                                                           |
| MoMask                                                                 | With richer contextual information, MATE generates the motion that best aligns with the input text, depicting a person pulling a rope forcefully while slightly moving backward in place. |
| BAMM                                                                   |                                                                                                                                                                                           |
| MATE                                                                   |                                                                                                                                                                                           |
| 3. A person is closing the <b>curtains</b> .                           |                                                                                                                                                                                           |
| MoMask                                                                 | All three motions fail to resemble the action of closing the curtains.                                                                                                                    |
| BAMM                                                                   |                                                                                                                                                                                           |
| MATE                                                                   |                                                                                                                                                                                           |
| 4. A person is pulling the <b>curtains</b> closed from left to right.  |                                                                                                                                                                                           |
| MoMask                                                                 | With more detailed descriptions, MATE generates a motion that best aligns with the input text, portraying a person pulling the curtains with a clear left-to-right arm movement.          |
| BAMM                                                                   |                                                                                                                                                                                           |
| MATE                                                                   |                                                                                                                                                                                           |
