# Supplementary material
Source: ML conference proceedings conference paper supplement (https://openreview.net/forum?id=zbHpRwzrq5)
Supplement: supplementary_material [file Readme.pdf › Appendix/Text-motion joint segmentation/Readme.pdf]

In each video, the left side shows the original textual description and corresponding motion sequence, while the right side presents the decomposed sub-texts generated by ChatGPT and the motion segments obtained through text-motion joint segmentation. The analysis is provided below.

|           |                                                                                                           |
|-----------|-----------------------------------------------------------------------------------------------------------|
| Example 1 | Correct.                                                                                                  |
| Example 2 | Correct.                                                                                                  |
| Example 3 | Correct.                                                                                                  |
| Example 4 | The last segment (“touch something”) partially includes the semantics of “step around to their right.”    |
| Example 5 | The last segment (“halts and sits down”) partially includes the semantics of “walks three steps forward.” |
